# Supplementary material for: Incremental medical cost of delirium in elderly patients with cognitive impairment: analysis of a nationwide administrative database in Japan
Source: PubMed Central journal article supplement — BMJ Open. 2022 Dec 14;12(12):e062141. doi: 10.1136/bmjopen-2022-062141 (PMC9756163; doi:10.1136/bmjopen-2022-062141), 2022-12-14
Supplement: bmjopen-2022-062141supp001.pdf [file bmjopen-2022-062141supp001.pdf]

## SUPPLEMENTARY INFORMATION

### Generalised linear model – exponent calculation

In the quasi-likelihood method (QLM), the variance function is proportional to a power (exponent) of the mean. To determine the initial value of the exponent, the sample means and variances for every combination of the categorised covariates included in the final model were calculated. A double logarithmic function was fit to the data, and the slope of the regression line was determined.<sup>1</sup> The initial value of the exponent was determined as 3.15, which was subsequently used as the exponent in the variance function.<sup>1</sup> A residual plot was generated to evaluate the model fit.<sup>2</sup> Because no specific trend in residuals was observed, the initial value of the exponent, 3.15, was retained. The geometric least squares (LS) mean, the geometric LS mean ratio and 95% confidence intervals for the total medical cost in the two groups were calculated.

## REFERENCES

1. Blough DK, Ramsey SD. Using generalized linear models to assess medical care costs. *Health Serv Outcomes Res Methodol* 2000;1:185–202.
2. Barber J, Thompson S. Multiple regression of cost data: use of generalised linear models. *J Health Serv Res Policy* 2004;9:197–204.

SUPPLEMENTARY FIGURES AND TABLES

Figure S1 Mean medical cost categorised by patient characteristics

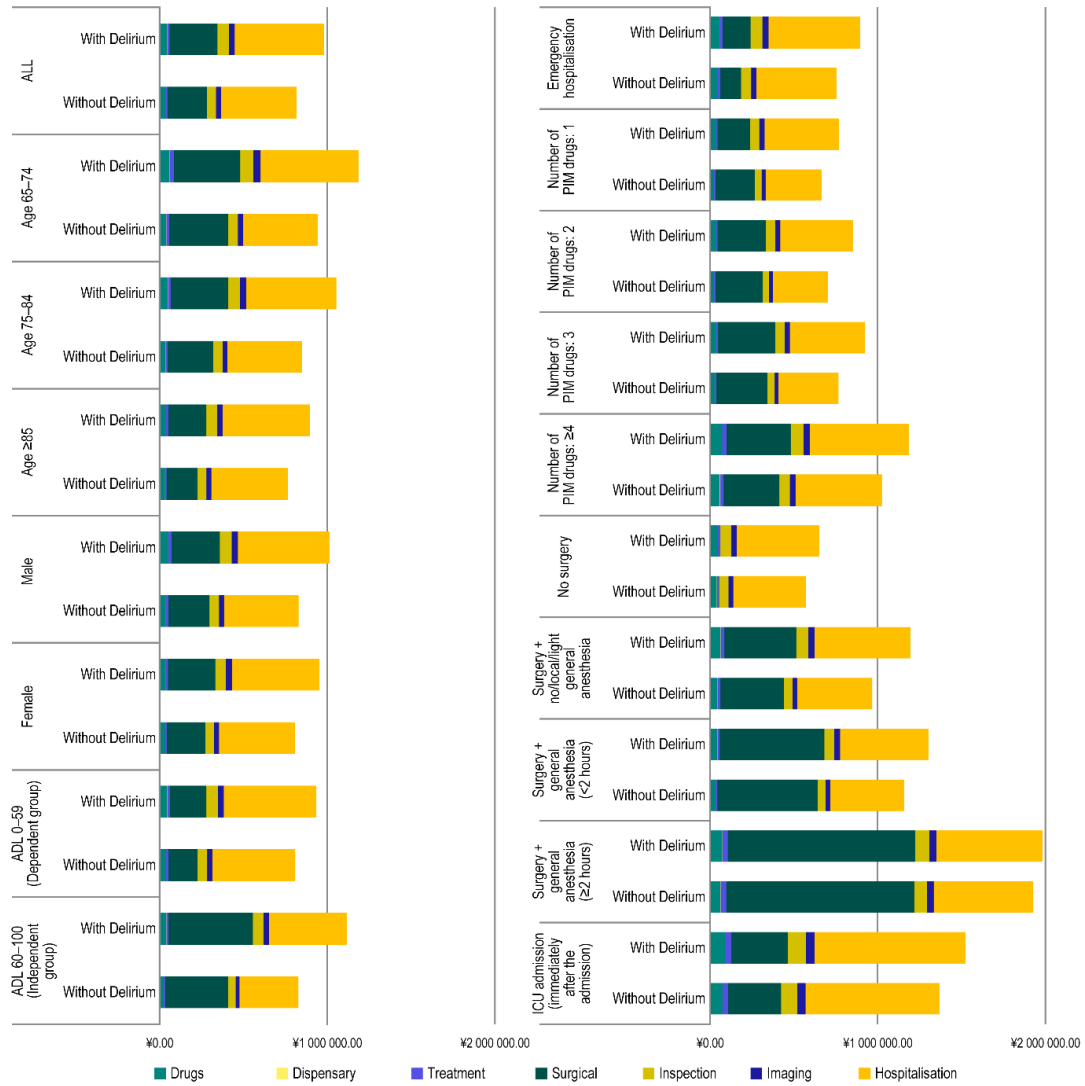

ICU, intensive care unit; PIM, potentially inappropriate medication.

**Figure S2** Medical cost categorised by comorbidities

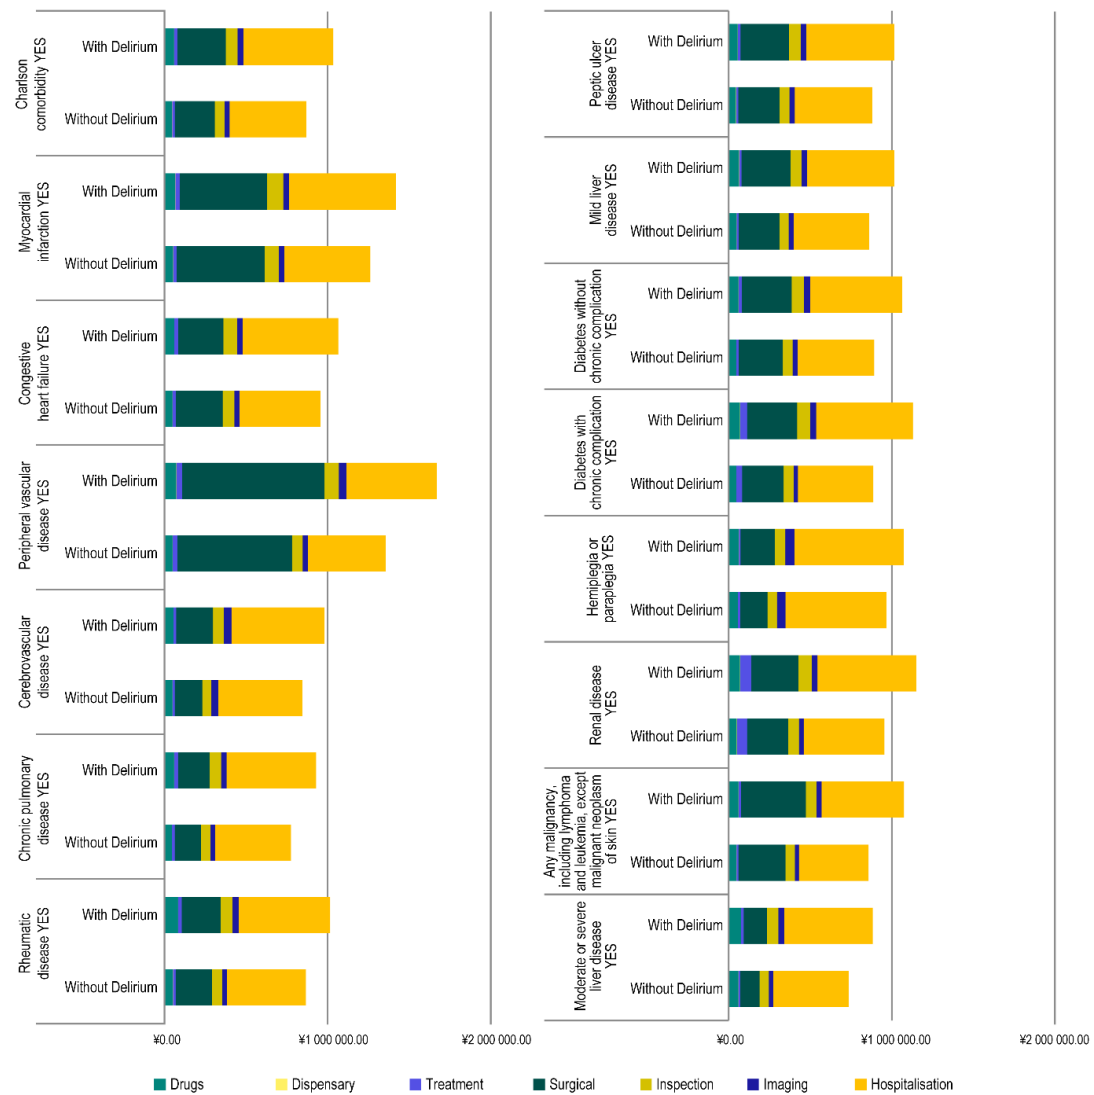

**Table S1** Definition of cognitive impairment

|                      |                                                                                    | Number of patients<br>with delirium |         | Number of patients<br>without delirium |         |
|----------------------|------------------------------------------------------------------------------------|-------------------------------------|---------|----------------------------------------|---------|
|                      |                                                                                    | n                                   | %       | n                                      | %       |
| Cognitive impairment | Yes                                                                                | 39 836                              | (100.0) | 257 764                                | (100.0) |
|                      | Diagnosis of dementia (ICD-10)                                                     | 21 341                              | (53.6)  | 112 687                                | (43.7)  |
|                      | Prescription of anti-dementia drugs                                                | 11 963                              | (30.0)  | 66 069                                 | (25.6)  |
|                      | Low degree of independence in<br>activities of daily living related to<br>dementia | 25 154                              | (63.1)  | 169 760                                | (65.9)  |

ICD-10, International Classification of Diseases, 10th Revision; n, number of patients.

**Table S2** Identification of patients with delirium

|                                                                          |                                                                              | Number of patients with delirium |        | Number of patients without delirium |       |       |
|--------------------------------------------------------------------------|------------------------------------------------------------------------------|----------------------------------|--------|-------------------------------------|-------|-------|
| Number of patients                                                       |                                                                              | 39 836                           |        | 257 764                             |       |       |
| Patients identified by delirium identification (ICD-10) algorithm, n (%) | Diagnosis of delirium only                                                   | 3685                             | (9.3)  | 0                                   | (0.0) |       |
|                                                                          | Prescription of antipsychotics only                                          | 33 611                           | (84.4) | 0                                   | (0.0) |       |
|                                                                          | Both                                                                         | 2540                             | (6.4)  | 0                                   | (0.0) |       |
| Diagnosis of delirium (ICD-10), n (%)                                    | Yes (delirium not induced by alcohol and other psychoactive substances, F05) | 6225                             | (15.6) | 0                                   | (0.0) |       |
|                                                                          | Delirium not superimposed on dementia (F05.0)                                | 130                              | (0.3)  | 0                                   | (0.0) |       |
|                                                                          | Delirium superimposed on dementia (F05.1)                                    | 1027                             | (2.6)  | 0                                   | (0.0) |       |
|                                                                          | Other delirium (F05.8)                                                       | 8                                | (0.0)  | 0                                   | (0.0) |       |
|                                                                          | Subacute cerebral syndrome                                                   | 4                                | (0.0)  | 0                                   | (0.0) |       |
|                                                                          | Acute confusional state                                                      | 2                                | (0.0)  | 0                                   | (0.0) |       |
|                                                                          | Acute brain syndrome                                                         | 2                                | (0.0)  | 0                                   | (0.0) |       |
|                                                                          | Delirium, unspecified (F05.9)                                                | 5100                             | (12.8) | 0                                   | (0.0) |       |
|                                                                          | Delirium                                                                     | 4093                             | (10.3) | 0                                   | (0.0) |       |
|                                                                          | Nocturnal delirium                                                           | 813                              | (2.0)  | 0                                   | (0.0) |       |
|                                                                          | Senile nocturnal delirium                                                    | 199                              | (0.5)  | 0                                   | (0.0) |       |
| Prescription of antipsychotics, n (%)                                    | Yes                                                                          | 36 151                           | (90.7) | 0                                   | (0.0) |       |
|                                                                          | Haloperidol                                                                  | INJ                              | 17 188 | (43.1)                              | 0     | (0.0) |
|                                                                          |                                                                              | TAB                              | 490    | (1.2)                               | 0     | (0.0) |
|                                                                          |                                                                              | FGR                              | 41     | (0.1)                               | 0     | (0.0) |
|                                                                          |                                                                              | SOL                              | 2      | (0.0)                               | 0     | (0.0) |
|                                                                          | Risperidone                                                                  | SOL                              | 12 081 | (30.3)                              | 0     | (0.0) |
|                                                                          |                                                                              | ODT                              | 2727   | (6.8)                               | 0     | (0.0) |
|                                                                          |                                                                              | TAB                              | 1762   | (4.4)                               | 0     | (0.0) |
|                                                                          |                                                                              | FGR                              | 75     | (0.2)                               | 0     | (0.0) |
|                                                                          |                                                                              | INJ                              | 1      | (0.0)                               | 0     | (0.0) |
|                                                                          | Quetiapine                                                                   | TAB                              | 7489   | (18.8)                              | 0     | (0.0) |
|                                                                          |                                                                              | FGR                              | 278    | (0.7)                               | 0     | (0.0) |
|                                                                          |                                                                              | SRT                              | 0      | (0.0)                               | 0     | (0.0) |
|                                                                          | Olanzapine                                                                   | TAB                              | 378    | (0.9)                               | 0     | (0.0) |
|                                                                          |                                                                              | ODT                              | 224    | (0.6)                               | 0     | (0.0) |
| FGR                                                                      |                                                                              | 36                               | (0.1)  | 0                                   | (0.0) |       |
| INJ                                                                      |                                                                              | 1                                | (0.0)  | 0                                   | (0.0) |       |
| Perospirone                                                              | TAB                                                                          | 767                              | (1.9)  | 0                                   | (0.0) |       |

FGR, fine granule; ICD-10, International Classification of Diseases, 10th Revision; INJ, injectable; N, number of patients; ODT, oral disintegrating tablet; SOL, solution; SRT, sustained release tablet; TAB, tablet.

**Table S3** Clinical practice

|                                       |                         | Number of patients<br>with delirium |        | Number of patients<br>without delirium |        |
|---------------------------------------|-------------------------|-------------------------------------|--------|----------------------------------------|--------|
| Number of patients                    |                         | 39 836                              |        | 257 764                                |        |
| Prescription of PIM, n (%)            | Yes                     | 18 370                              | (46.1) | 108 326                                | (42.0) |
|                                       | PIM class               |                                     |        |                                        |        |
|                                       | Benzodiazepines         | 7666                                | (19.2) | 45 166                                 | (17.5) |
|                                       | Opioids                 | 5183                                | (13.0) | 26 293                                 | (10.2) |
|                                       | Corticosteroids         | 3933                                | (9.9)  | 28 048                                 | (10.9) |
|                                       | H2-receptor antagonists | 3925                                | (9.9)  | 24 036                                 | (9.3)  |
|                                       | Non-benzodiazepines     | 2606                                | (6.5)  | 12 624                                 | (4.9)  |
|                                       | H1-receptor antagonists | 2488                                | (6.2)  | 11 214                                 | (4.4)  |
|                                       | Antidepressants         | 72                                  | (0.2)  | 578                                    | (0.2)  |
| Anticholinergic drugs                 | 62                      | (0.2)                               | 459    | (0.2)                                  |        |
| Duration of hospitalisation<br>(days) | Mean (SD)               | 15.9 (11.6)                         |        | 14.2 (13.4)                            |        |
|                                       | Median                  | 14.0                                |        | 12.0                                   |        |
|                                       | [Q1, Q3]                | [9.0, 20.0]                         |        | [7.0, 18.0]                            |        |
|                                       | [Min, Max]              | [3, 495]                            |        | [3, 1357]                              |        |
|                                       | ≤ 1 week                | 6429                                | (16.1) | 69 819                                 | (27.1) |
|                                       | 1 week < - ≤ 2 weeks    | 14 771                              | (37.1) | 88 409                                 | (34.3) |
|                                       | 2 weeks < - ≤ 3 weeks   | 10 600                              | (26.6) | 55 885                                 | (21.7) |
|                                       | 3 weeks < - ≤ 4 weeks   | 4860                                | (12.2) | 26 227                                 | (10.2) |
|                                       | 4 weeks < - ≤ 12 weeks  | 3049                                | (7.7)  | 16 523                                 | (6.4)  |
|                                       | >12 weeks               | 127                                 | (0.3)  | 901                                    | (0.3)  |
| Use of ICU                            | Yes                     | 5942                                | (14.9) | 20 975                                 | (8.1)  |
| Duration of ICU stay<br>(days)        | Mean (SD)               | 3.2 (2.9)                           |        | 2.9 (2.9)                              |        |
|                                       | Median                  | 2.0                                 |        | 2.0                                    |        |
|                                       | [Q1, Q3]                | [1.0, 4.0]                          |        | [1.0, 4.0]                             |        |
|                                       | 1 day                   | 2038                                | (5.1)  | 8692                                   | (3.4)  |
|                                       | 2 days                  | 1232                                | (3.1)  | 4204                                   | (1.6)  |
|                                       | 3 days                  | 829                                 | (2.1)  | 2773                                   | (1.1)  |
|                                       | 4 days                  | 535                                 | (1.3)  | 1649                                   | (0.6)  |
|                                       | 5 days                  | 389                                 | (1.0)  | 1042                                   | (0.4)  |
|                                       | 6 days                  | 277                                 | (0.7)  | 691                                    | (0.3)  |
|                                       | ≥7 days                 | 642                                 | (1.6)  | 1,924                                  | (0.8)  |

ICU, intensive care unit; n, number of patients; PIM, potentially inappropriate medication.

**Table S4** Univariate and multivariable analyses for total medical cost

| Categories                       | n <sup>†</sup> | Univariate analysis                          |                                     |         | Multivariable analysis                     |                                     |         |
|----------------------------------|----------------|----------------------------------------------|-------------------------------------|---------|--------------------------------------------|-------------------------------------|---------|
|                                  |                | Geometric LS Mean <sup>§</sup><br>[95% CI]   | Geometric LS Mean Ratio<br>[95% CI] | P-value | Geometric LS Mean <sup>§</sup><br>[95% CI] | Geometric LS Mean Ratio<br>[95% CI] | P-value |
| <b>Delirium</b>                  |                |                                              |                                     |         |                                            |                                     |         |
| Without                          | 257 764        | 816 137.39<br>[813 142.03, 819 143.79]       | Ref                                 |         | 745 294.95<br>[743 312.18, 747 283.02]     | Ref                                 |         |
| With                             | 39 836         | 979 907.90<br>[969 783.64, 990 137.85]       | 1.20<br>[1.19, 1.21]                | p<0.001 | 815 721.23<br>[810 206.11, 821 273.88]     | 1.09<br>[1.09, 1.10]                | p<0.001 |
| <b>Age (years)</b>               |                |                                              |                                     |         |                                            |                                     |         |
| 65–74                            | 32 220         | 970 981.96<br>[960 264.35, 981 819.19]       | Ref                                 |         | 791 810.64<br>[785 966.32, 797 698.42]     | Ref                                 |         |
| 75–84                            | 111 176        | 875 684.51<br>[870 766.49, 880 630.30]       | 0.90<br>[0.89, 0.91]                | p<0.001 | 759 844.50<br>[756 869.58, 762 831.11]     | 0.96<br>[0.95, 0.97]                | p<0.001 |
| ≥85                              | 154 204        | 783 162.50<br>[779 657.12, 786 683.63]       | 0.81<br>[0.80, 0.82]                | p<0.001 | 742 836.46<br>[740 330.23, 745 351.18]     | 0.94<br>[0.93, 0.95]                | p<0.001 |
| <b>Sex</b>                       |                |                                              |                                     |         |                                            |                                     |         |
| Male                             | 121 417        | 856 423.75<br>[851 758.80, 861 114.26]       | Ref                                 |         | 760 340.59<br>[757 466.10, 763 225.98]     | Ref                                 |         |
| Female                           | 176 183        | 825 403.68<br>[821 747.47, 829 076.15]       | 0.96<br>[0.96, 0.97]                | p<0.001 | 750 235.54<br>[747 864.66, 752 613.94]     | 0.99<br>[0.98, 0.99]                | p<0.001 |
| <b>ADL score (points)</b>        |                |                                              |                                     |         |                                            |                                     |         |
| 0–59                             | 206 443        | 827 168.97<br>[823 776.86, 830 575.05]       | Ref                                 |         | 782 325.73<br>[779 918.81, 784 740.08]     | Ref                                 |         |
| 60–100                           | 87 360         | 858 426.56<br>[852 905.30, 863 983.56]       | 1.04<br>[1.03, 1.05]                | p<0.001 | 692 121.10<br>[688 983.95, 695 272.52]     | 0.88<br>[0.88, 0.89]                | p<0.001 |
| <b>Comorbidities<sup>†</sup></b> |                |                                              |                                     |         |                                            |                                     |         |
| <b>Myocardial infarction</b>     |                |                                              |                                     |         |                                            |                                     |         |
| Yes                              | 8464           | 1 283 247.71<br>[1 250 209.84, 1 317 158.63] | Ref                                 |         | 858 222.93<br>[844 622.77, 872 042.08]     | Ref                                 |         |

| Categories                  | Univariate analysis |                                              |                         |         | Multivariable analysis                 |                         |         |
|-----------------------------|---------------------|----------------------------------------------|-------------------------|---------|----------------------------------------|-------------------------|---------|
|                             | n <sup>‡</sup>      | Geometric LS Mean <sup>§</sup>               | Geometric LS Mean Ratio | P-value | Geometric LS Mean <sup>§</sup>         | Geometric LS Mean Ratio | P-value |
|                             |                     | [95% CI]                                     | [95% CI]                |         | [95% CI]                               | [95% CI]                |         |
| No                          | 289 136             | 825 030.17<br>[822 176.08, 827 894.16]       | 0.64<br>[0.63, 0.66]    | p<0.001 | 751 501.99<br>[749 592.23, 753 416.62] | 0.88<br>[0.86, 0.89]    | p<0.001 |
| Congestive heart failure    |                     |                                              |                         |         |                                        |                         |         |
| Yes                         | 51 355              | 971 424.84<br>[962 803.22, 980 123.68]       | Ref                     |         | 880 345.55<br>[875 051.97, 885 671.14] | Ref                     |         |
| No                          | 246 245             | 810 245.79<br>[807 278.03, 813 224.46]       | 0.83<br>[0.83, 0.84]    | p<0.001 | 730 461.61<br>[728 508.10, 732 420.35] | 0.83<br>[0.82, 0.84]    | p<0.001 |
| Peripheral vascular disease |                     |                                              |                         |         |                                        |                         |         |
| Yes                         | 8850                | 1 411 778.68<br>[1 374 850.80, 1 449 698.41] | Ref                     |         | 974 908.71<br>[959 465.71, 990 600.27] | Ref                     |         |
| No                          | 288 750             | 820 506.76<br>[817 721.02, 823 302.00]       | 0.58<br>[0.57, 0.60]    | p<0.001 | 748 457.71<br>[746 561.13, 750 359.11] | 0.77<br>[0.76, 0.78]    | p<0.001 |
| Cerebrovascular disease     |                     |                                              |                         |         |                                        |                         |         |
| Yes                         | 62 901              | 859 792.08<br>[853 239.47, 866 395.01]       | Ref                     |         | 832 895.13<br>[828 462.74, 837 351.23] | Ref                     |         |
| No                          | 234 699             | 832 234.89<br>[829 005.98, 835 476.38]       | 0.97<br>[0.96, 0.98]    | p<0.001 | 734 578.88<br>[732 566.05, 736 597.24] | 0.88<br>[0.88, 0.89]    | p<0.001 |
| Chronic pulmonary disease   |                     |                                              |                         |         |                                        |                         |         |
| Yes                         | 17 563              | 797 779.79<br>[786 809.06, 808 903.50]       | Ref                     |         | 781 634.02<br>[774 427.35, 788 907.75] | Ref                     |         |
| No                          | 280 037             | 840 585.61<br>[837 587.48, 843 594.47]       | 1.05<br>[1.04, 1.07]    | p<0.001 | 752 656.84<br>[750 723.74, 754 594.92] | 0.96<br>[0.95, 0.97]    | p<0.001 |
| Rheumatic disease           |                     |                                              |                         |         |                                        |                         |         |
| Yes                         | 4017                | 885 481.30<br>[858 673.54, 913 125.99]       | Ref                     |         | 787 870.87<br>[772 432.04, 803 618.27] | Ref                     |         |
| No                          | 293 583             | 837 410.51<br>[834 498.94, 840 332.25]       | 0.95<br>[0.92, 0.98]    | p<0.001 | 753 889.45<br>[751 985.70, 755 798.02] | 0.96<br>[0.94, 0.98]    | p<0.001 |
| Peptic ulcer disease        |                     |                                              |                         |         |                                        |                         |         |



| Categories                            | Univariate analysis |                                          |                         |         | Multivariable analysis                 |                         |         |
|---------------------------------------|---------------------|------------------------------------------|-------------------------|---------|----------------------------------------|-------------------------|---------|
|                                       | n <sup>†</sup>      | Geometric LS Mean <sup>§</sup>           | Geometric LS Mean Ratio | P-value | Geometric LS Mean <sup>§</sup>         | Geometric LS Mean Ratio | P-value |
|                                       |                     | [95% CI]                                 | [95% CI]                |         | [95% CI]                               | [95% CI]                |         |
| Yes                                   | 15 858              | 898 974.79<br>[885 049.60, 913 119.07]   | Ref                     |         | 769 874.99<br>[762 026.48, 777 804.34] | Ref                     |         |
| No                                    | 281 742             | 834 630.71<br>[831 673.42, 837 598.52]   | 0.93<br>[0.91, 0.94]    | p<0.001 | 753 478.83<br>[751 542.42, 755 420.23] | 0.98<br>[0.97, 0.99]    | p<0.001 |
| Mild liver disease                    |                     |                                          |                         |         |                                        |                         |         |
| Yes                                   | 9482                | 883 934.28<br>[866 433.60, 901 788.44]   | Ref                     |         | 787 281.56<br>[776 793.81, 797 910.91] | Ref                     |         |
| No                                    | 288 118             | 836 549.62<br>[833 614.25, 839 495.33]   | 0.95<br>[0.93, 0.97]    | p<0.001 | 753 275.38<br>[751 357.62, 755 198.05] | 0.96<br>[0.94, 0.97]    | p<0.001 |
| Diabetes without chronic complication |                     |                                          |                         |         |                                        |                         |         |
| Yes                                   | 40 046              | 914 169.39<br>[905 205.75, 923 221.79]   | Ref                     |         | 794 680.73<br>[789 536.56, 799 858.41] | Ref                     |         |
| No                                    | 257 554             | 826 225.36<br>[823 201.28, 829 260.54]   | 0.90<br>[0.89, 0.91]    | p<0.001 | 748 257.02<br>[746 268.72, 750 250.62] | 0.94<br>[0.94, 0.95]    | p<0.001 |
| Diabetes with chronic complication    |                     |                                          |                         |         |                                        |                         |         |
| Yes                                   | 8959                | 915 347.36<br>[896 366.30, 934 730.35]   | Ref                     |         | 783 602.75<br>[773 012.63, 794 337.96] | Ref                     |         |
| No                                    | 288 641             | 835 660.47<br>[832 737.34, 838 593.86]   | 0.91<br>[0.89, 0.93]    | p<0.001 | 753 449.92<br>[751 534.01, 755 370.71] | 0.96<br>[0.95, 0.97]    | p<0.001 |
| Hemiplegia or paraplegia              |                     |                                          |                         |         |                                        |                         |         |
| Yes                                   | 3955                | 976 219.29<br>[944 738.52, 1 008 749.07] | Ref                     |         | 873 678.85<br>[854 561.54, 893 223.84] | Ref                     |         |
| No                                    | 293 645             | 836 198.54<br>[833 292.41, 839 114.80]   | 0.86<br>[0.83, 0.89]    | p<0.001 | 752 855.32<br>[750 954.84, 754 760.61] | 0.86<br>[0.84, 0.88]    | p<0.001 |
| Renal disease                         |                     |                                          |                         |         |                                        |                         |         |
| Yes                                   | 18 117              | 981 851.58<br>[967 029.48, 996 900.86]   | Ref                     |         | 829 892.85<br>[821 699.57, 838 167.82] | Ref                     |         |

| Categories                                                                          | Univariate analysis |                                        |                         |         | Multivariable analysis                 |                         |         |  |
|-------------------------------------------------------------------------------------|---------------------|----------------------------------------|-------------------------|---------|----------------------------------------|-------------------------|---------|--|
|                                                                                     | n <sup>†</sup>      | Geometric LS Mean <sup>§</sup>         | Geometric LS Mean Ratio | P-value | Geometric LS Mean <sup>§</sup>         | Geometric LS Mean Ratio | P-value |  |
|                                                                                     |                     | [95% CI]                               | [95% CI]                |         | [95% CI]                               | [95% CI]                |         |  |
| No                                                                                  | 279 483             | 828 738.49<br>[825 830.94, 831 656.27] | 0.84<br>[0.83, 0.86]    | p<0.001 | 749 684.48<br>[747 756.51, 751 617.42] | 0.90<br>[0.89, 0.91]    | p<0.001 |  |
| Any malignancy, including lymphoma and leukaemia, except malignant neoplasm of skin |                     |                                        |                         |         |                                        |                         |         |  |
| Yes                                                                                 | 34 770              | 894 940.92<br>[885 556.43, 904 424.87] | Ref                     |         | 756 333.75<br>[750 844.57, 761 863.06] | Ref                     |         |  |
| No                                                                                  | 262 830             | 830 534.45<br>[827 488.96, 833 591.14] | 0.93<br>[0.92, 0.94]    | p<0.001 | 754 076.15<br>[752 060.81, 756 096.88] | 1.00<br>[0.99, 1.00]    | 0.450   |  |
| Moderate or severe liver disease                                                    |                     |                                        |                         |         |                                        |                         |         |  |
| Yes                                                                                 | 1293                | 759 638.71<br>[722 861.93, 798 286.57] | Ref                     |         | 763 512.80<br>[737 776.84, 790 146.51] | Ref                     |         |  |
| No                                                                                  | 296 307             | 838 401.58<br>[835 498.51, 841 314.73] | 1.10<br>[1.05, 1.16]    | p<0.001 | 754 300.54<br>[752 402.34, 756 203.54] | 0.99<br>[0.95, 1.02]    | 0.488   |  |
| Metastatic solid tumour                                                             |                     |                                        |                         |         |                                        |                         |         |  |
| Yes                                                                                 | 5601                | 844 997.61<br>[823 846.20, 866 692.06] | Ref                     |         | 799 764.56<br>[786 066.03, 813 701.82] | Ref                     |         |  |
| No                                                                                  | 291 999             | 837 926.28<br>[835 003.64, 840 859.16] | 0.99<br>[0.97, 1.02]    | 0.520   | 753 493.48<br>[751 586.47, 755 405.34] | 0.94<br>[0.93, 0.96]    | p<0.001 |  |
| <b>Emergency hospitalisation</b>                                                    |                     |                                        |                         |         |                                        |                         |         |  |
| Yes                                                                                 | 220 990             | 774 165.90<br>[771 234.05, 777 108.89] | Ref                     |         | 801 606.91<br>[798 857.56, 804 365.73] | Ref                     |         |  |
| No                                                                                  | 56 736              | 972 011.84<br>[963 755.28, 980 339.13] | 1.26<br>[1.24, 1.27]    | p<0.001 | 607 271.67<br>[602 729.33, 611 848.24] | 0.76<br>[0.75, 0.76]    | p<0.001 |  |
| <b>Number of PIM drugs</b>                                                          |                     |                                        |                         |         |                                        |                         |         |  |
| 0                                                                                   | 170 904             | 799 179.22<br>[795 776.56, 802 596.43] | Ref                     |         | 773 552.61<br>[771 014.71, 776 098.86] | Ref                     |         |  |
| 1                                                                                   | 23 553              | 675 395.61<br>[668 382.66, 682 482.15] | 0.85<br>[0.84, 0.85]    | p<0.001 | 632 724.36<br>[627 952.83, 637 532.13] | 0.82<br>[0.81, 0.82]    | p<0.001 |  |

| Categories                                             | Univariate analysis |                                              |                         |         | Multivariable analysis                       |                         |         |
|--------------------------------------------------------|---------------------|----------------------------------------------|-------------------------|---------|----------------------------------------------|-------------------------|---------|
|                                                        | n <sup>†</sup>      | Geometric LS Mean <sup>§</sup>               | Geometric LS Mean Ratio | P-value | Geometric LS Mean <sup>§</sup>               | Geometric LS Mean Ratio | P-value |
|                                                        |                     | [95% CI]                                     | [95% CI]                |         | [95% CI]                                     | [95% CI]                |         |
| 2                                                      | 22 405              | 717 867.17<br>[709 955.60, 725 866.90]       | 0.90<br>[0.89, 0.91]    | p<0.001 | 609 627.10<br>[604 829.38, 614 462.89]       | 0.79<br>[0.78, 0.79]    | p<0.001 |
| 3                                                      | 15 929              | 786 527.42<br>[775 709.98, 797 495.71]       | 0.98<br>[0.97, 1.00]    | 0.031   | 651 387.10<br>[645 148.52, 657 686.00]       | 0.84<br>[0.83, 0.85]    | p<0.001 |
| ≥4                                                     | 64 809              | 1 053 920.10<br>[1 045 398.80, 1 062 510.86] | 1.32<br>[1.31, 1.33]    | p<0.001 | 839 977.97<br>[835 377.19, 844 604.09]       | 1.09<br>[1.08, 1.09]    | p<0.001 |
| <b>ICU admission (Immediately after the admission)</b> |                     |                                              |                         |         |                                              |                         |         |
| Yes                                                    | 21 843              | 1 400 460.24<br>[1 377 051.74, 1 424 266.67] | Ref                     |         | 1 200 167.33<br>[1 186 502.18, 1 213 989.87] | Ref                     |         |
| No                                                     | 275 757             | 793 510.74<br>[790 796.18, 796 234.61]       | 0.57<br>[0.56, 0.58]    | p<0.001 | 727 493.58<br>[725 647.54, 729 344.32]       | 0.61<br>[0.60, 0.61]    | p<0.001 |
| <b>Type of surgery</b>                                 |                     |                                              |                         |         |                                              |                         |         |
| No surgery                                             | 163 428             | 582 783.35<br>[581 113.35, 584 458.15]       | Ref                     |         | 521 053.69<br>[519 281.97, 522 831.45]       | Ref                     |         |
| Surgery + no/local/light general anaesthesia           | 88 164              | 992 997.25<br>[987 747.24, 998 275.17]       | 1.70<br>[1.69, 1.71]    | p<0.001 | 1 010 902.09<br>[1 005 260.17, 1 016 575.68] | 1.94<br>[1.93, 1.95]    | p<0.001 |
| Surgery + general anaesthesia (<2 hours)               | 29 725              | 1 178 860.92<br>[1 167 047.13, 1 190 794.29] | 2.02<br>[2.00, 2.04]    | p<0.001 | 1 349 139.14<br>[1 335 579.50, 1 362 836.45] | 2.59<br>[2.56, 2.62]    | p<0.001 |
| Surgery + general anaesthesia (≥2 hours)               | 16 283              | 1 939 178.48<br>[1 904 403.92, 1 974 588.02] | 3.33<br>[3.27, 3.39]    | p<0.001 | 2 179 481.16<br>[2 141 798.56, 2 217 826.74] | 4.18<br>[4.11, 4.26]    | p<0.001 |

ADL, activities of daily living; ICU, intensive care unit; JPY, Japanese Yen; LS, least squares; n, number of patients; PIM, potentially inappropriate medication; Ref, reference category.

<sup>†</sup>15 comorbidities excluding dementia and AIDS/HIV from the 17 Charlson comorbidities were examined.

<sup>‡</sup>Patients with missing data for the corresponding variable are not included. The multiple imputation method was applied only in the multivariable analysis.

<sup>§</sup>Unit: JPY.
